# Supplementary material for: Analyzing biological traits of riparian forest along ecoregions and local habitats to define functional targets for their restoration at different scales
Source: Research Square preprint supplement (doi:10.21203/rs.3.rs-7775825/v1), 2025-11-14
Supplement: Supplementary file 1 [file 5506fac1c394d7098610705b.docx]

Supporting information to the paper

**Analyzing biological traits of riparian forest along ecoregions and local habitats to define functional targets for their restoration at different scales**. *Plant Ecology.*

Pero, Edgardo Javier Ignacio 1,3<https://orcid.org/0000-0002-6335-8654>, Piccinetti, Mayra Alejandra 2,3, and María Celina Reynaga 2

1 Centro de Investigación y Transferencia (CIT) Rafaela, UNRaf - CONICET, Santa Fe, Argentina.

2 Instituto de Biodiversidad Neotropical (IBN), Consejo Nacional de Investigaciones Científicas y Técnicas (CONICET), Universidad Nacional de Tucumán (UNT), Facultad de Ciencias Naturales e Instituto Miguel Lillo (IML).

3 Facultad de Ciencias Naturales e Instituto Miguel Lillo, Universidad Nacional de Tucumán

Edgardo J. I. Pero, Corresponding author. Email: [edgardo.pero@unraf.edu.ar](mailto:edgardo.pero@unraf.edu.ar)

**Appendix S1.** Sampling sites location (ecoregion, province, stream, geographic coordinates and abbreviation).

Ecoregion Province Stream (geographic coordinates) Abbreviation

Yungas forest Tucumán Las Conchas (S 26º47`04`` - W 65º20`17``) Y1

Yungas forest Tucumán El Sonador (S 27º09`32`` - W 65º42`35``) Y2

Yungas forest Tucumán Pueblo Viejo (S 27°11’29’’ - W 65°40’12’’) Y3

Yungas forest Tucumán Apeadero (S 26º59`14`` - W 66º39`49``) Y4

Western Chaco Tucumán Urueña (S 26°13’37’’ - W 64°32’12’’) C1

Western Chaco Santiago del Estero Urueña (S 26°15’17’’ - W 64°29’39’’) C2

Western Chaco Tucumán Tala (S 26°13’19’’ - W 65°15’15’’) C3

Western Chaco Tucumán Salí (S 26°13’27’’ - W 65°15’21’’) C4

Western Chaco Tucumán Chico (S 27°31’20’’ - W 65°16’4.5’’) C5

Western Chaco Tucumán Marapa (S 27°39’26’’ - W 65°14’59’’) C6

Supporting information to the paper

Pero, E.J.I. et al. Functional traits of riparian vegetation vary along local habitat and ecoregional gradients. *Journal of Vegetation Science.*

**Appendix S2.** Species list.

| Species | Family | Ecoregion | Abreviation |
| --- | --- | --- | --- |
| *Abutilon niveum* Griseb. | Malvaceae | C | An |
| *Acacia aroma* Gillies ex Hook. and Arn | Fabaceae | C | Aa |
| *Achatocarpus praecox* Griseb. | Achatocarpaceae | C | Ap |
| *Allophylus edulis* (A. St.-Hil., A. Juss. and Cambess.) Hieron. ex Niederl. | Sapindaceae | Y | Ae |
| *Alnus acuminata* Kunth | Betulaceae | Y | Al |
| *Anisocapparis speciosa* (Griseb.) X. Cornejo and H.H. Iltis | Capparaceae | C | As |
| *Arundo donax* L. | Poaceae | C | Ad |
| *Baccharis sp.* | Asteraceae | C | Ba |
| *Bidens sp.* | Asteraceae | Y | Bi |
| *Blepharocalyx salicifolius* (Kunth) O. Berg | Myrtaceae | Y | Bs |
| *Bougainvillea stipitata* Griseb. | Nyctaginaceae | C | Bo |
| *Bulnesia foliosa* Griseb. | Zygophylaceae | C | Bf |
| *Caesalpinia paraguariensis* (D. Parodi) Burkart | Fabaceae | C | Ce |
| *Capparicordis tweediana* (Eichler) H.H. Iltis and X. Cornejo | Capparaceae | C | Ct |
| *Celtis iguanaea* (Jacq.) Sarg. | Celtidaceae | Y | Cg |
| *Celtis tala* Gillies ex Planch. *= Celtis ehrenbergiana* (Klotzsch) Liebm. var. ehrenbergiana | Celtidaceae | C | Cet |
| *Cestrum strigilatum* Ruiz and Pav. | Solanaceae | Y | Cst |
| *Chamissoa altissima* (Jacq.) Kunth | Amaranthaceae | Y | Cha |
| *Chenopodium sp.* | Chenopodiaceae | C | Ch |
| *Chrysophyllum marginatum* (Hook. and Arn.) Radlk. | Sapotaceae | Y | Cm |
| *Cinnamomun porphyrium* (Griseb.) Kosterm.= *Ocotea* *porphyria* (Griseb.) van der Werff | Lauraceae | Y | Cpo |
| *Citrus aurantium* L. | Rutaceae | Y | Ci |
| *Croton sp.* | Euphorbiaceae | C | Cr |
| *Cupania vernalis* Cambess. | Sapindaceae | Y | Cv |
| *Duranta serratifolia* (Griseb.) Kuntze | Verbenaceae |  | Ds |
| *Enterolobium contortisiliquum* (Vell.) Morong | Fabaceae | Y | Eco |
| *Ephedra sp.* | Ephedraceae | C | Ep |
| *Equisetum giganteum* L. | Equisetaceae | C, Y | Eg |
| *Erythrina crista-galli* L. | Fabaceae | C | Ec |
| *Eugenia uniflora* L. | Myrtaceae | Y | Eu |
| *Geoffroea decorticans* (Gillies ex Hook. and Arn.) Burkart | Fabaceae | C | Gd |
| *Hedychium coronarium* J. König | Zingiberaceae | Y | He |
| *Heimia montana* (Griseb.) Lillo | Lythraceae | C, Y | Hm |
| *Iresine diffusa* Humb. and Bonpl. ex Willd. | Asteraceae | Y | Id |
| *Jacaranda mimosifolia* D. Don | Bignoniaceae | Y | Jm |
| *Juglans australis* Griseb. | Juglandaceae | Y | Ja |
| *Justicia sp.* | Acanthaceae | C, Y | Ju |
| *Lantana canescens* Kunth | Verbenaceae | C | La |
| *Lippia sp.* | Verbenaceae | C | Li |
| *Ludwigia sp.* | Onagraceae | Y | Lu |
| *Lycium sp.1* | Solanaceae | C | Ls |
| *Lycium sp. 2* | Solanaceae | C | LsII |
| *Malva sp.* | Malvaceae | C | Ma |
| *Maytenus vitis-idaea* Griseb. | Celastraceae | C | Mv |
| *Melia azedarach* L. | Meliaceae | C | Ma |
| *Miconia ioneura* Griseb. | Melastomataceae | Y | Mi |
| *Morus sp.* L. | Moraceae | C | Mo |
| *Myrcianthes mato* (Griseb.) McVaugh | Myrtaceae | Y | Mm |
| *Myrcianthes pungens* (O. Berg) D. Legrand | Myrtaceae | Y | Mp |
| *Nicotiana glauca* Graham | Solanaceae | C | Ng |
| *Opuntia quimilo* K. Schum. | Cactaceae | C | Oq |
| *Parapiptadenia excelsa* (Griseb.) Burkart | Fabaceae | Y | Pe |
| *Phenax laevigatus* Wedd. | Urticaceae | Y | Pl |
| *Piper hieronymi* C. DC. var. hieronymi | Piperaceae | Y | Ph |
| *Piper tucumanum* C. DC. | Piperaceae | Y | Pt |
| *Prosopis alba* Griseb. | Fabaceae | C | Pa |
| *Prosopis ruscifolia* Griseb. | Fabaceae | C | Pv |
| *Prunus tucumanensis* Lillo | Rosaceae | Y | Ptu |
| *Psycotria carthagenensis* Jacq. | Rubiaceae | Y | Pc |
| *Pteridophyta indet.* | - | C | Pte |
| *Randia micracantha* (Lillo) Bacigalupo | Rubiaceae | Y | Rs |
| *Ricinus communis* L. | Euphorbiaceae | C | Rc |
| *Rubus imperialis* Cham. and Schltdl. | Rosaceae | Y | Ri |
| *Ruprechtia apetala* Wedd. | Polygonaceae | C | Rt |
| *Salix humboldtiana* Willd. | Salicaceae | C | Sa |
| *Sapium haematospermum* Müll. Arg. | Euphorbiaceae | C | Sh |
| *Schinus bumelioides* I.M. Johnst. | Anacardiaceae | C | Sb |
| *Schinus fasciculatus* (Griseb.) I.M. Johnst. | Anacardiaceae | C | Sf |
| *Schinus gracilipes* I.M. Johnst. | Anacardiaceae | Y | Sg |
| *Senna morongii* (Britton) H.S. Irwin and Barneby | Fabaceae | C | Se |
| *Serjania marginata* Casar. | Sapindaceae | C | Sm |
| *Sida rhombifolia* L. | Asteraceae | C | Sr |
| *Solanum sp.* | Solanaceae | C, Y | So |
| *Solanum palinacanthum* Dunal = *S. claviceps* | Solanaceae | Y | Sc |
| *Solanum hieronymi* Kuntze | Solanaceae | C | Sp |
| *Solanum riparium* Pers. | Solanaceae | Y | Sri |
| *Tamarix ramosissima* Ledeb. | Tamaricaceae | C | Tr |
| *Terminalia triflora* (Griseb.) Lillo | Combretaceae | C, Y | Tt |
| *Tessaria dodoneifolia* (Hook. and Arn.) Cabrera | Asteraceae | C | Td |
| *Tessaria integrifolia* Ruiz and Pav. | Asteraceae | C, Y | Ti |
| *Thelypteris sp.* | Thelypteridaceae | Y | Th |
| *Tipuana tipu* (Benth.) Kuntze | Fabaceae | Y | Tti |
| *Trema micranta* (L.) Blume | Urticaceae | Y | Tm |
| *Urera baccifera* (L.) Gaudich. | Urticaceae | Y | Ub |
| *Urera caracasana* (Jacq.) Gaudich. ex Griseb. | Urticaceae | C, Y | Uc |
| *Vallesia glabra* (Cav.) Link | Apocynaceae | C | Vg |
| *Verbesina suncho* (Griseb.) S.F. Blake | Asteraceae | C, Y | Vs |
| *Vernonia fulta* Griseb. = *Quechualia fulta* (Griseb.) H. Rob. | Asteraceae | C, Y | Vf |
| *Xylosma pubescens* Griseb. | Salicaceae | Y | Xp |
| *Ziziphus mistol* Griseb. = *Sarcomphalus mistol* (Griseb.) Hauenschild | Ramnaceae | C | Zm |

Supporting information to the paper

Pero, E.J.I. et al. Functional traits of riparian vegetation vary along local habitat and ecoregional gradients. *Journal of Vegetation Science.*

**Appendix S3.** Trait profiles defined and coded using the fuzzy technique of the identified taxa. 0 = no affinity for the modality; 1 = affinity for the modality.
